# Supplementary material for: Surface-enhanced Raman scattering used to study the structure of layers formed on metal surfaces from single-stranded DNA and 6-mercaptohexan-1-ol: influence of hybridization with the complementary DNA and influence of the metal substrate
Source: Royal Society of Chemistry journal article supplement (doi:10.1039/d2ra05318g), 2022-01-01
Supplement: d2ra05318g1.pdf [file d2ra05318g1.pdf]

### Supplementary information

#### Surface-enhanced Raman scattering used to study the structure of layers formed on metal surfaces from single-stranded DNA and 6-mercaptohexan-1-ol: Influence of hybridization with the complementary DNA and influence of the metal substrate

Aleksandra Michałowska<sup>1</sup>, Aleksandra Gajda<sup>1</sup>, Agata Kowalczyk<sup>1</sup>, Jan L. Weyher<sup>2</sup>, Anna M. Nowicka<sup>1</sup>, Andrzej Kudelski<sup>1\*</sup>

<sup>1</sup> Faculty of Chemistry, University of Warsaw, Pasteura 1 Str., PL 02-093 Warsaw, Poland

<sup>2</sup> Institute of High Pressure Physics of the Polish Academy of Science, Sokolowska 29/37 Str., PL 01-142 Warsaw, Poland

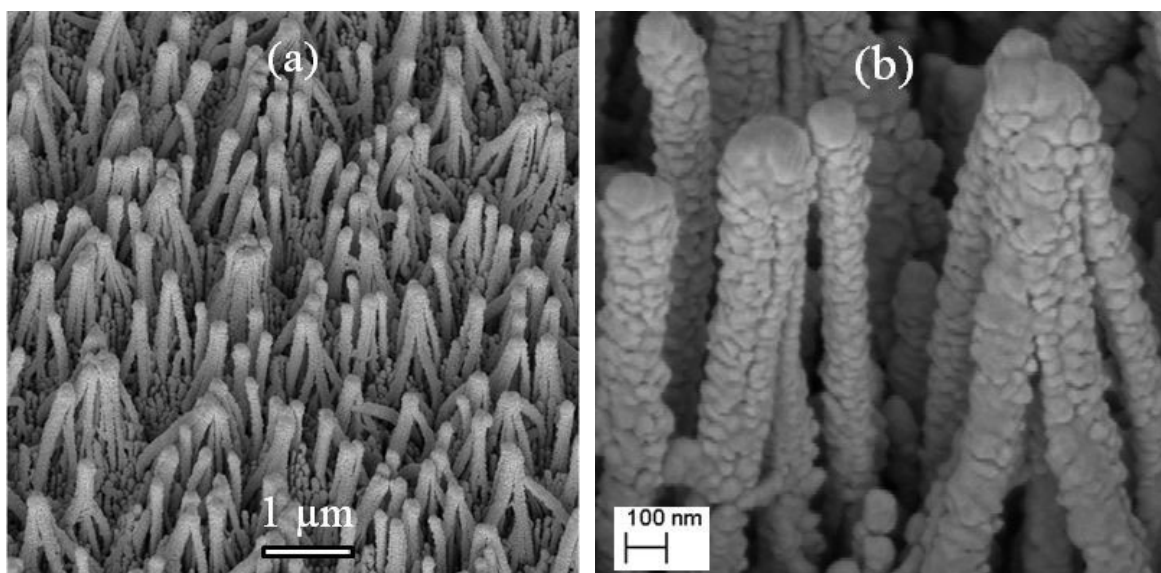

**Figure S1.** SEM images of a hetero-epitaxial GaN layer covered by gold.

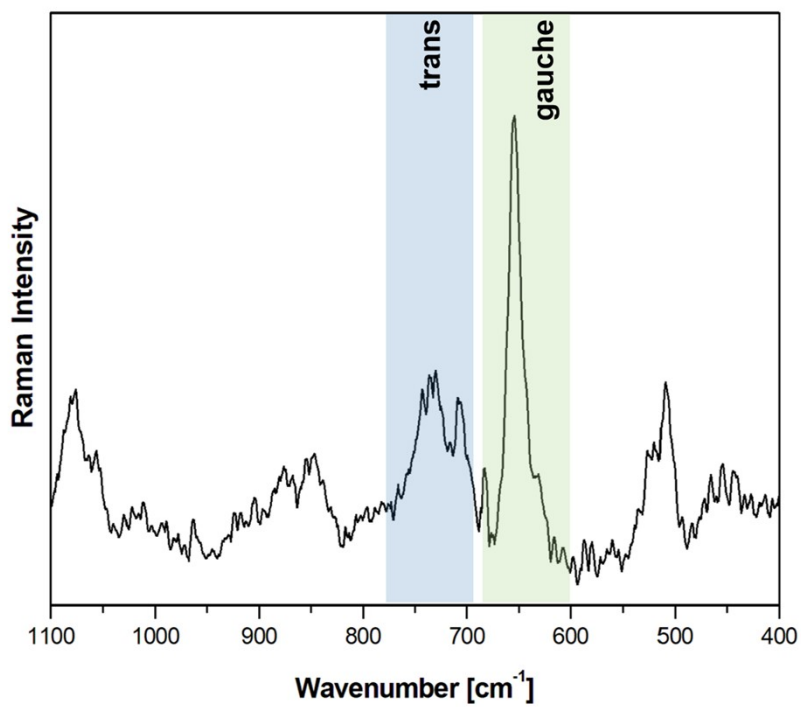

**Figure S2.** Raman spectrum of liquid 6-mercaptohexan-1-ol.
